1 **Genome-wide survey of *Pseudomonas aeruginosa* PA14 reveals a role for the glyoxylate pathway**  
2 **and extracellular proteases in the limited utilization of mucin.**

3

4 Jeffrey M. Flynn,<sup>a</sup> Chi Phan,<sup>a</sup> Ryan C. Hunter,<sup>a#</sup>

5

6 Department of Microbiology & Immunology, University of Minnesota, Minneapolis, Minnesota<sup>a</sup>

7

8 Running Head: Mucin degradation by *Pseudomonas aeruginosa*

9

10 #Address correspondence to Ryan C. Hunter, [rchunter@umn.edu](mailto:rchunter@umn.edu)

1 **ABSTRACT**

2 Chronic airway infections by the opportunistic pathogen *Pseudomonas aeruginosa* are major cause of  
3 mortality in cystic fibrosis (CF) patients. While this bacterium has been extensively studied for its  
4 virulence mechanisms, biofilm growth and immune evasion within the CF airways, comparatively little is  
5 known about the nutrient sources that sustain its growth *in vivo*. Respiratory mucins represent a  
6 potentially abundant bioavailable nutrient source, though we have recently shown that canonical  
7 pathogens inefficiently use these host glycoproteins as a growth substrate. Yet, given that *P. aeruginosa*,  
8 particularly in its biofilm mode of growth is thought to grow slowly *in vivo*, the inefficient use of mucin  
9 glycoproteins may have relevance to its persistence within the CF airways. To this end, here we use  
10 whole genome fitness analysis combining transposon mutagenesis with high throughput sequencing  
11 (TnSeq) to identify genetic determinants required for *P. aeruginosa* growth using intact purified mucins  
12 as a sole carbon source. Our analysis reveals a biphasic growth phenotype, during which the glyoxylate  
13 pathway and amino acid biosynthetic machinery are required for mucin utilization. Secondary analyses  
14 confirmed the simultaneous liberation and consumption of acetate during mucin degradation and  
15 revealed a central role for the extracellular proteases LasB and AprA. Together, these studies identified  
16 the *P. aeruginosa* genes required for mucin-based nutrient acquisition and reveal a host-pathogen  
17 dynamic that may contribute to its persistence within the CF airways.

18

## 1 INTRODUCTION

2 Cystic fibrosis (CF), a common and lethal autosomal recessive disease, results from mutations in  
3 the gene encoding the cystic fibrosis transmembrane conductance regulator (CFTR) protein (1). Impaired  
4 CFTR function leads to abnormal transepithelial ion transport and a thickened, dehydrated mucus layer  
5 that overlays the epithelium of several organs, including the lungs (2,3). Airway mucus obstruction results  
6 in impaired mucociliary clearance, facilitating chronic colonization by a complex bacterial community. The  
7 ensuing inflammatory response leads to bronchiectasis, progressive lung damage, and eventual  
8 respiratory failure (2). Despite the recent surge in studies describing a polymicrobial etiology of CF, *P.*  
9 *aeruginosa* continues to be widely recognized as the primary driver of disease progression (4). This  
10 opportunistic pathogen can reach densities of  $10^7$ - $10^9$  cfu gm<sup>-1</sup> of sputum, particularly in late stages of  
11 disease, suggesting that the mucus environment of the lower airways provides them with an ideal growth  
12 environment (5,6). A deeper understanding of this milieu, and its ability to sustain *P. aeruginosa* growth  
13 *in vivo* is critically important to improved disease management.

14 The mucosal layer covering the respiratory epithelium is a complex mixture of water, salts,  
15 protein, lipid, nucleic acids, mucins and lower molecular mass glycoproteins (7). The gel-forming mucins,  
16 MUC5B and MUC5AC, are highly glycosylated (70-80% by weight) polypeptides that form a cross-linked,  
17 hydrated gel and comprise the major macromolecular constituents of the mucus layer. These mucins  
18 protect the underlying airway mucosa as they provide a first line of innate immune defense against  
19 pathogens and environmental toxins (8). In CF, however, the hypersecretion and accumulation of  
20 mucins, their increased viscosity and impaired clearance compromises their role in host defense and are  
21 thought to contribute to disease pathophysiology (9-12). For example, *P. aeruginosa* has mucin-specific  
22 adhesins that mediate surface attachment by recognizing sialic acid and N-acetylglucosamine residues  
23 (13-15). Moreover, studies have shown that CF mucins are bound more efficiently by *P. aeruginosa*  
24 relative to non-CF mucins (15). Various reports have also described the role of mucins in stimulating  
25 bacterial surface motility, biofilm and aggregate formation, and the transition between biofilm and free-  
26 swimming states (16-20). In addition, the direct interaction of mucins with respiratory pathogens is  
27 thought to serve as a signaling event for the induction of various virulence factors (21).

1 Mucins also represent an abundant, host-derived nutrient reservoir for pathogens to utilize. In  
2 fact, all mucosal sites throughout the human body harbor both commensal and pathogenic organisms  
3 that possess mucin-degrading enzymes capable of deriving nutrients from host (22-24). Indeed, several  
4 studies have described the degradation and utilization of mucins by CF-associated microbiota (25-29).  
5 For example, multiple studies have shown that *P. aeruginosa* and other pathogens (e.g. *Burkholderia*  
6 *cepecia* complex, Bcc) harbor mucin sulfatase activity capable of utilizing sialylated mucin  
7 oligosaccharides as a source of sulfur (26,28). Others have shown that Bcc isolates possess mucinase  
8 activity that can sustain pathogen growth using mucins as a sole carbon source (29). These studies  
9 emphasize the potential importance of mucins as a growth substrate for the initiation and maintenance of  
10 CF infections *in vivo*.

11 To investigate respiratory mucin-bacterial interactions in further detail, artificial sputum media  
12 (ASM) is commonly used to mimic the *in vivo* nutritional environment of the diseased airways. Among its  
13 constituents, porcine gastric mucin (PGM) is incorporated as a model carbon substrate because of its  
14 cost, ease of preparation, and similarity to human tracheal mucins in carbohydrate composition (30,31).  
15 Use of PGM-based “sputum” media has generated insight into *P. aeruginosa* physiology under  
16 conditions relevant to the CF airways. For example, Sriramulu et al. (32) demonstrated that when PGMs  
17 are omitted from ASM, *P. aeruginosa* growth is limited, which implicated mucins as an important carbon  
18 source. Others have shown that PGM-based ASM media yield similar *P. aeruginosa* transcriptional  
19 profiles as the same isolates grown on re-constituted CF patient sputum (33). However, we have recently  
20 revealed that when commercial mucins are prepared such that low molecular weight metabolites are  
21 removed, *P. aeruginosa* growth is slow and significantly impaired. Growth was significantly improved  
22 (>10-fold) when co-cultured with mucin-degrading anaerobes (34). This observation suggests an  
23 inefficient use of intact mucin glycoproteins by the primary CF pathogen; however, this limited growth  
24 may have relevance to the slow *in vivo* growth rates of *P. aeruginosa* reported previously (35). Motivated  
25 by this possibility, here we further characterized the growth of *P. aeruginosa* PA14 on intact PGM. In  
26 addition, we used transposon insertion sequencing (TnSeq; 36) to identify the mechanisms by which *P.*  
27 *aeruginosa* degrades and consumes mucins when provided as a sole carbon source. Among essential

1 loci were genes associated with the glyoxylate pathway and amino acid biosynthesis. Further  
2 characterization and mutant analyses confirmed that both acetate and amino acids are consumed  
3 throughout a biphasic growth pattern. These results suggest that the liberation of these metabolites from  
4 airway mucins may have potential implications for *P. aeruginosa* growth and persistence within the CF  
5 airways.

6

## 7 **MATERIALS AND METHODS**

8 **Bacterial strains, plasmids and culture conditions.** A list of bacterial strains and plasmids is provided  
9 in Table 1. All strains were routinely cultured in Luria-Bertani (LB, Difco) broth and LB agar. Gentamicin  
10 sulfate (50  $\mu\text{g ml}^{-1}$ ) and 2,6-diaminopimelic acid (DAP, 250  $\mu\text{M}$ ) were added where necessary. Mucin  
11 minimal medium (MMM) was prepared as described previously (34). Briefly, porcine gastric mucins  
12 (Type III, Sigma-Aldrich) were dissolved in water to 30  $\text{g L}^{-1}$  and autoclaved. Mucins were then dialyzed  
13 against ultrapure water with a 13kDa MWCO dialysis membrane, and clarified by centrifugation at  
14 100,000  $\times g$  for 30 min. MMM was made by adding the specified amount of mucins to a defined medium  
15 containing 60mM  $\text{KH}_2\text{PO}_4$  (pH 7.4), 90mM NaCl, 1mM  $\text{MgSO}_4$ , and a trace minerals mix described  
16 elsewhere (37). The final MMM was also filter-sterilized (0.45  $\mu\text{m}$ ). For growth with glucose or casamino  
17 acids (CasAA), the MMM described above was used without mucin but with added glucose or CasAA at  
18 the specified concentrations. Minimal glucose cultures were also supplemented with 60 mM  $\text{NH}_4\text{Cl}$ .

19 **Growth on mucins.** For growth assays, a colony was picked from freshly streaked LB agar, inoculated  
20 into LB broth, and allowed to grow for 16 h. Strains were washed twice with phosphate buffered saline  
21 before inoculation into 5 mL of MMM to an initial  $\text{OD}_{600}$  of  $\sim 0.05$ . Tubes were shaken continuously at 200  
22 RPM at 37°C and  $\text{OD}_{600}$  was monitored over time using a Spectronic 20 spectrophotometer (Bausch and  
23 Lomb). 100  $\mu\text{L}$  aliquots were removed throughout growth where specified, immediately frozen at -80°C  
24 and stored for downstream analysis.

25 **Protein and acetate quantification.** Acetate was measured using an Acetate Colorimetric Assay Kit  
26 (Biovision) and protein content was measured using Qubit fluorometry (Thermo-Fisher) according to  
27 manufacturers protocols.

1 **TnSeq.** TnSeq protocols were based on previously published methods (36,40). First, the previously  
2 modified mariner transposon (41) was further modified to replace the kanamycin resistance cassette with  
3 a gentamicin cassette for use in *P. aeruginosa*. Briefly, the plasmid containing the transposon and  
4 transposase (pEB001)(40) was used as template in a PCR using TnSwap1 and TnSwap2 (a list of  
5 primers is shown in Table S1) to generate a fragment containing the whole pEB001 plasmid lacking a  
6 selectable marker. Next, the gene encoding gentamicin acetyltransferase (gent<sup>R</sup>) was amplified from  
7 pBBR1MCS-5 (42) using GentR\_Fwd and GentR\_Rev primers. Gibson assembly (43) was used to  
8 combine gent<sup>R</sup> with the linearized pEB001 plasmid generated by PCR above to create pJF1. Next, pJF1  
9 was transformed into the conjugative mating strain WM3064 (39) and a saturating transposon mutant  
10 library was generated by mating *P. aeruginosa* PA14 with WM3064 (containing pJF1) on LB + DAP agar  
11 plates followed by selection on LB gentamicin (50 µg mL<sup>-1</sup>). Mutants (~70,000) were pooled en masse in  
12 LB + 15% glycerol and were frozen in 100µL aliquots.

13 Outgrowth experiments are described in Figure 2. Briefly, one 100 µL aliquot was pelleted and  
14 frozen for gDNA extraction (“Parent”). A second glycerol stock was thawed, washed twice in PBS before  
15 inoculation into 5mL of MMM to an OD<sub>600</sub> of 0.02. Cultures were shaken at 250 RPM at 37°C and OD<sub>600</sub>  
16 was monitored until the cells reached ~0.4. 0.25mL of this culture was then used to inoculate a fresh  
17 5mL of MMM and allowed to grow to ~0.4 (representing approximately 10 doublings, “1<sup>st</sup> Phase”). A  
18 second culture was prepared by inoculating an additional 100µL glycerol stock into filter-sterilized spent  
19 growth medium from the 1<sup>st</sup> phase, followed by outgrowth to ~0.4 OD. As described above, 0.25mL was  
20 used to inoculate a fresh 5mL of spent medium and allowed to grow again to ~0.4 (~10 doublings, “2<sup>nd</sup>  
21 phase”). Bacterial cells were harvested by centrifugation and frozen at -80°C.

22 Genomic DNA (gDNA) was extracted from frozen cell pellets using the Wizard Genomic DNA  
23 Purification Kit (Promega), cut with Mmel restriction enzyme (New England Biolabs) and treated with calf  
24 intestinal phosphatase (New England Biolabs). Oligonucleotide adapters (Table S1) with a 3'-NN  
25 overhang containing appropriate sequences for Illumina sequencing were ligated to the resulting  
26 fragments using T4 ligase (New England Biolabs). Adapters were barcoded with a unique 4 bp sequence

1 to enable multiplexing. PCR was then performed using ligation reactions as template with primers  
2 specific for the inverted repeat region on the transposon and the ligated adapter (P1\_M6\_Mmel and  
3 Gex\_PCR\_Primer, respectively). These primers introduce sequences suitable for direct sequencing in an  
4 Illumina flowcell. The resulting reaction product (120 bp) was purified by gel extraction using a PureLink  
5 Quick Gel Extraction Kit (LifeTechnologies) and sent to the University of Minnesota Biomedical  
6 Genomics Center for sequencing on the Illumina HiSeq 2500 platform (single end, 50 bp). Downstream  
7 analysis was performed on the Galaxy server (44-46) at the Minnesota Supercomputing Institute. Reads  
8 were split by unique barcode and trimmed to obtain the sequence adjacent to the transposon insertion.  
9 The resulting sequence was mapped to the PA14 genome (Genbank GCA\_000014625.1) using Bowtie,  
10 discarding reads with greater than 1bp mismatch and sequences mapping to multiple locations.  
11 Insertions within the first 5% and last 10% of the open reading frame were also discarded to provide  
12 greater assurance that the insertion resulted in a null mutation. With these parameters, the Parent, 1<sup>st</sup>  
13 phase, and 2<sup>nd</sup> phase had 27 million, 17 million, and 10 million total mapped hits, respectively. Genes  
14 with fewer than 10 unique insertions in the parent library were removed from analysis to limit their  
15 associated variability. Fitness values for each gene were then scored by computing a hit-normalized fold  
16 change for each growth condition ( $\log_2(\text{outgrowth library hits} / \text{parent library hits})$ ). This calculation  
17 identifies the fold-change in transposon mutant abundance between the parent and outgrowth  
18 populations (*i.e.* for a gene with a score of -2, there were 4X the number of cells containing a mutation in  
19 the parent library compared to the outgrowth). Negative fold-changes signified mutations with fitness  
20 defects under the outgrowth condition.

21 **Genetic manipulation.** In-frame, markerless deletions in PA14 were generated using established  
22 homologous recombination techniques. Plasmids (Table 1) were derived from the suicide vector pSMV8  
23 (39) and manipulated using standard molecular biology protocols with *E. coli* DH5 $\alpha$  (UQ950). For  
24 deletion constructs, 1000 bp regions flanking the gene to be deleted (including 3-6 codons of the  
25 beginning and end of the genes) were amplified by PCR using primers listed in Table S1. Fragments  
26 were joined and cloned into pSMV8 digested with SpeI and XhoI using Gibson assembly and chemically  
27 transformed into UQ950. Positive ligations were screened by PCR, transformed into *E. coli* strain

1 WM3064 and mobilized into PA14 by conjugation. Recombinants of PA14 were selected for on LB agar  
2 plates containing gentamicin (Gm), and double recombinants were selected for on LB agar containing  
3 6% sucrose. Complementation vectors were constructed by cloning the gene (*lasB*, *aprA*, and *aceA*) with  
4 an additional ~50 bp upstream of the start site followed by ligation into pBBR1MCS-5. Briefly, fragments  
5 were amplified by PCR using gene specific primers (Table S1). Resulting fragments were gel-purified  
6 and digested using the restriction enzymes KpnI, SacI, and XhoI where appropriate. After digestion,  
7 purified fragments were combined with digested pBBR1MCS-5, ligated using T4 ligase and transformed  
8 into UQ950. Positive transformants were screened by PCR and confirmed by sequencing.  
9 Complementation constructs were mated into PA14 via conjugation using WM3064 as described above.  
10 Successful matings were selected for by plating on LB agar containing gentamicin. All constructs and  
11 deletions were verified by sequencing.

12

## 13 RESULTS

14 **PA14 exhibits an inefficient, biphasic growth phenotype using mucins as a growth substrate.** To  
15 assess the ability of PA14 to break down and metabolize intact mucins, porcine gastric mucin (PGM) was  
16 prepared by autoclaving followed by dialysis to remove low molecular weight metabolites. This ensured  
17 that any observed growth was due to the use of large, intact glycoproteins. PA14 grew to a density of 0.6  
18 in 10 g L<sup>-1</sup> undialyzed mucins; however, when PGM was dialyzed, density fell to 0.25 (Fig 1A). These  
19 data suggest that over half of the bioavailable nutrients for PA14 in the undialyzed mucin preparation  
20 were composed of small metabolites.

21 To facilitate the study of *P. aeruginosa* growth on intact mucins, we then increased the PGM  
22 content in the culture medium to 30 g L<sup>-1</sup>, well above physiological concentrations. Under these  
23 conditions, a biphasic growth pattern was observed. Growth up to 0.35 OD (“1<sup>st</sup> Phase”) proceeded with  
24 a doubling time approximately 2X that of growth from 0.35 to 0.8 (“2<sup>nd</sup> phase”)(Fig. 1B), which reached its  
25 peak cell density after 11 hours. To determine if there was an unfulfilled nutrient requirement that limited  
26 *P. aeruginosa* growth in either growth phase, we then grew PA14 on PGM with and without supplements  
27 of sulfur (magnesium sulfate, 1mM) and nitrogen (ammonium chloride, 60mM)(Fig. 1B). Neither



1 supplement stimulated an increase in cell density, suggesting that the limiting nutrient of our minimal  
2 mucin medium (MMM) was likely carbon.

3 To assess the efficiency of PA14 to utilize PGM relative to other carbon sources (e.g., the  
4 constituent amino acids and sugars in mucin glycoproteins), we then compared growth yields of PA14  
5 when grown on glucose, casamino acids (CasAA), and PGM alone (Fig. 1C). On a gram-per-OD basis,  
6 PA14 obtained ~25X the density using glucose and ~100X the density using CasAA relative to dialyzed  
7 mucin (1.28, 0.3, and 34 g L<sup>-1</sup> OD<sup>-1</sup> for glucose, CasAA, and mucin, respectively). This limited growth  
8 yield of PA14 on mucins relative to other carbon sources underscores the inefficient use of intact mucin  
9 glycoproteins by *P. aeruginosa*.

10

11 **TnSeq reveals a need for glyoxylate bypass in mucin utilization.** Despite the inefficient growth of *P.*  
12 *aeruginosa* on mucins, any breakdown and metabolism of these glycoproteins may be relevant to  
13 pathogen growth and persistence within the CF airways. Therefore, we sought to determine the  
14 mechanisms by which PA14 utilizes intact mucins in the absence of a complex, mucin-degrading  
15 bacterial community (34). To do so, we used a high-throughput transposon insertion sequencing  
16 approach, TnSeq, to identify the genetic requirements for *P. aeruginosa* throughout its biphasic growth  
17 phenotype described in Fig. 2B. This method allows for a comprehensive, single-culture mutant screen  
18 using a pooled transposon library, outgrowth of that library under a set of selective conditions, followed  
19 by Illumina sequencing to provide a semi-quantitative measure of fitness for each gene. Using the  
20 sequencing output, a fitness score for transposon insertions at each genetic locus can be calculated. We  
21 applied this technique to study PA14 growth under selection in the first (rapid) growth phase, and the  
22 second (slow) growth phase for ~10 generations each.

23 Our experimental approach is shown in Fig. 2. A library of ~70,000 transposon mutants were  
24 isolated on LB agar plates, pooled, and frozen. To perform the selection experiments, an aliquot was  
25 thawed and used to inoculate the MMM growth medium, and the remaining culture was then pelleted and  
26 frozen for genomic DNA isolation. Two medium conditions were then tested for selection: (i) dialyzed  
27 minimal mucin medium (MMM) and (ii) MMM depleted of the “1<sup>st</sup> phase” carbon source. To achieve the

1 latter, PA14 was grown in MMM until an OD<sub>600</sub> of 0.4 and the spent medium was filter sterilized. Media  
2 were then inoculated to 0.02 OD from the parent library and were allowed to grow to OD<sub>600</sub> ~0.4. The  
3 resulting cultures were then re-inoculated to 0.02 OD and allowed to grow again to 0.4. Total growth was  
4 equal to approximately 10 doublings. Genomic DNA directly adjacent to each transposon insertion was  
5 then sequenced and insertion sites for each genetic locus in both the outgrowth and parent libraries were  
6 quantified. Using the relative abundance of transposon insertions at each locus, fitness scores were  
7 calculated for the essentiality of each gene in the two outgrowth conditions. The parent library contained  
8 59,380 unique transposon insertion sites with an average of 8.7 insertions in the central 85% of the  
9 coding region. To calculate fitness values for each gene under a given selection condition, the number of  
10 reads mapped to a given gene in the outgrowth library were divided by the number of reads in the parent  
11 library, followed by a base-two logarithm conversion to calculate fold-changes between populations. After  
12 this transformation, a score of -2 or less was interpreted as a significant fitness defect.

13 The data revealed that multiple genes required for the first growth phase were not required for the  
14 second growth phase (Table 2, Table S2). By contrast, no genes were identified that were required for  
15 the second growth phase but not required for the first. In the first growth phase, multiple transposon  
16 insertions in genes encoding glyoxylate pathway enzymes had decreased fitness. These included *aceA*,  
17 encoding isocitrate lyase, and *glcB*, encoding malate synthase. Fitness defects in these transposon  
18 mutants suggested that the primary carbon source during rapid growth (1<sup>st</sup> phase) was either a 2-carbon  
19 compound (e.g. acetate) or fatty acids, both of which require the action of the glyoxylate pathway for  
20 catabolism and growth. In addition to glyoxylate requirements, PA14 also required multiple genes  
21 encoding amino acid biosynthesis enzymes (*arg*, *cys*, *ilv*, *leu*, *met*, *trp*). This requirement suggested that  
22 despite being grown on a carbon-rich glycoprotein, any liberation of amino acids from the mucin  
23 polypeptide was not rapid enough to satisfy the nutritional requirements of *P. aeruginosa* during the first  
24 growth phase.

25 The second, slower growth phase showed no defects conferred by single transposon insertions  
26 when compared to the first growth phase alone. These results, in sharp contrast to the first phase, are  
27 indicative of a diverse nutritional substrate pool whereby the disruption of a single gene does not confer

1 a growth defect. For example, PA14 did not require any specific amino acid biosynthetic genes,  
2 suggesting that a complete mix of amino acids were liberated from mucins and were available as  
3 'community goods'. Under these conditions, transposon insertions that would otherwise result in a  
4 growth-inhibited phenotype for an auxotrophic mutant in pure culture might not confer a defect in a  
5 community of pooled transposon mutants with mixed abilities. Given the lack of amino acid biosynthetic  
6 genes required for the second growth phase, we hypothesized that amino acids were being liberated  
7 from mucins and serving as the primary source of carbon and energy.

8

9 **PA14 liberates and consumes acetate in the first phase of growth and consumes amino acids**  
10 **throughout growth.** Given the requirement for the glyoxylate pathway, we hypothesized that acetate  
11 may be liberated from mucin. To assess this, we monitored acetate concentrations in the medium  
12 throughout growth. Though no acetate was initially present in the growth medium, it rapidly accumulated  
13 in the culture supernatant during the first growth phase (Fig. 3A). Its concentration increased until the  
14 transition between the first and second growth phase (~0.3 OD), where it was rapidly consumed. This  
15 result is consistent with the glyoxylate pathway being required for the first growth phase in which 2-  
16 carbon compounds serve as a primary carbon source.

17 Given that no amino acid biosynthetic genes were essential in the second growth phase, we  
18 predicted that amino acids were liberated via degradation of the mucin glycoprotein. We therefore  
19 quantified protein content (excluding free amino acids) in the medium supernatant (Figure 3B).  
20 Interestingly, protein concentration remained unchanged in the first phase of growth, and rapidly declined  
21 in the second phase. Taken together, these observations demonstrate a sequential use of carbon  
22 sources (acetate, followed by amino acids) derived from the mucin glycoprotein.

23

24 **Growth of *aceA*, *lasB* and *aprA* mutants demonstrate growth defects in PGM.** To confirm the  
25 importance of acetate and the glyoxylate pathway in the first phase of growth, a non-polar, markerless  
26 deletion was made in *aceA*, encoding isocitrate lyase, which catalyzes the first step in the glyoxylate  
27 pathway. Any strain lacking this committed step would not be able to use acetate as a sole carbon

1 source because it would be unable to correctly balance carbon requirements in the TCA cycle.  
2 Consistent with this limitation, the *aceA* mutant demonstrated a marked growth defect relative to WT and  
3 reached a lower final density (Fig. 4A, Fig. S1). The incomplete abolishment of growth suggests that  
4 the  $\Delta aceA$  mutant is capable of obtaining carbon via other means but that the glyoxylate pathway defect  
5 restricts its growth and overall yield.

6 Protein consumption in the second growth phase suggested that one or more extracellular  
7 proteases were being employed to degrade the mucin polypeptide backbone. To address this possibility,  
8 we tested four extracellular proteases (LasA, LasB, AprA and SppA) that may be important for the  
9 degradation of extracellular peptides. Non-polar, markerless deletions were made in genes encoding  
10 each of these proteases and their growth was assayed versus WT in MMM (Fig. 4B,C). Interestingly,  
11 only mutants lacking LasB and AprA exhibited defects in the second phase of growth and lower final  
12 densities, while complementation with *lasB* and *aprA in trans* was able to restore the WT phenotype (Fig.  
13 S1). These data demonstrate that elastase (LasB) and alkaline protease (AprA) are used by *P.*  
14 *aeruginosa* during slow growth on mucins to utilize the polypeptide backbone as a carbon source.

15

## 16 **DISCUSSION**

17 In contrast to *Streptococcus*, *Akkermansia*, *Bacteroides* and other bacterial genera that have an  
18 extensive repertoire of enzymes devoted to catabolizing host-associated glycoproteins in the gut and oral  
19 cavity (24, 47-50), the primary cystic fibrosis pathogen, *P. aeruginosa*, is not known to encode any  
20 glycosidases used in the breakdown of respiratory mucins. Indeed, here we demonstrate that strain  
21 PA14 uses intact mucins inefficiently compared to its carbohydrate and amino acid monomeric  
22 constituents (glucose and amino acids). However, when purified and dialyzed mucins were provided at  
23 high concentrations, we observed a slow, biphasic growth of PA14 to an appreciable density. This  
24 observation suggests that a even a partial breakdown of mucin glycoproteins may support the slow  
25 growth (35) and persistence of *P. aeruginosa* in the CF airways.

26 The limited degradation of porcine-derived mucins by strain PA14 was not unexpected; in the oral  
27 cavity, for example, diverse consortia of bacteria are required to completely breakdown salivary mucins

1 (50-51). Yet, our data are in contrast to previous studies that have implicated *P. aeruginosa* and another  
2 CF pathogen, *Burkholderia cenocepacia*, in the degradation of mucins within the airways (25,29). We  
3 propose that this discrepancy may be explained by the limitations of mucin detection methods.  
4 Immunoblotting, a commonly used approach for evaluating mucin content, relies on anti-MUC5AC and  
5 anti-MUC5B antibodies directed towards their epitopes on the terminal, non-glycosylated regions (*i.e.*  
6 apomucin) of the macromolecule, as previously shown (52). Given that extracellular proteases (and not  
7 glycosidases) were found here to be essential for PA14 growth on PGM, we suspect that proteolytic  
8 degradation removes only the terminal polypeptide regions, leaving the bulk of the mucin glycoprotein  
9 intact. This limited degradation would give the impression of more extensive mucin breakdown via  
10 Western immunoblotting (52). Consequently, we favor the interpretation that mucinase activity previously  
11 ascribed to *P. aeruginosa* is likely due to terminal polypeptide degradation mediated by the extracellular  
12 proteases (LasB, AprA) described here (Fig. 4).

13 TnSeq analysis implicated a critical role for the glyoxylate shunt (*aceA*, *glcB*) in the generation  
14 and consumption of nutrients during the first phase of mucin growth. The requirement for this pathway  
15 implies a shift to C2 carbon metabolism, and led to the discovery of the use of acetate by *P. aeruginosa*  
16 during growth on PGM. The requirement for the glyoxylate pathway stems from the fact that carbon  
17 sources entering central metabolism below pyruvate must go through the TCA cycle to malate to be fed  
18 to gluconeogenic pathways. To correctly balance TCA cycle metabolites, the glyoxylate pathway is  
19 required for the regeneration of four carbon intermediates (*e.g.* malate). While the glyoxylate shunt is  
20 also essential for fatty acid and lipid metabolism under nutrient-limited growth conditions, direct  
21 measurements of the culture supernatant confirmed that acetate accumulates in the growth medium  
22 followed by its consumption. We hypothesize that acetate is likely derived via deacetylation of sugars (N-  
23 acetylglucosamine, N-acetylgalactosamine and sialic acids) that decorate the polypeptide backbone.,  
24 Further studies are required to determine the source and enzymes responsible for the accumulation of  
25 this metabolite.

26 Interestingly, the glyoxylate pathway has been implicated in various *in vivo* infection models. For  
27 example, an isocitrate lyase mutant ( $\Delta aceA$ ) of *P. aeruginosa* demonstrated significantly less virulence

1 and host tissue damage in a rat lung infection model (53). In addition, a  $\Delta aceA\Delta glcB$  double mutant of *P.*  
2 *aeruginosa* was cleared by 48h post-infection in a murine acute pneumonia model (54), yet showed no  
3 defective phenotypes in septicemia, underscoring its importance in the nutrient-limited environment of  
4 the lower airways. Son et al. (55) demonstrated that genes required for the glyoxylate cycle in *P.*  
5 *aeruginosa* are highly expressed within sputum derived from CF patients, while others have reported that  
6 *aceA* is more highly expressed in CF *P. aeruginosa* isolates compared to those derived from non-CF  
7 sources when grown *in vitro* (56). Notably, acetate has also been found at elevated concentrations within  
8 CF sputum and bronchoalveolar lavage fluid (34,57,58). Our data, when considered in the context of the  
9 aforementioned studies, support a role for the glyoxylate shunt in respiratory mucin degradation by *P.*  
10 *aeruginosa*. Moreover, since isocitrate lyase (*AceA*) and malate synthase (*GlcB*) have no known ortholog  
11 in humans, our data also provide further motivation to explore the glyoxylate shunt as a target for anti-  
12 Pseudomonal therapy, as previously suggested (59-62).

13         Though TnSeq did not identify extracellular proteases, mutant analysis demonstrated that *lasB*  
14 and *aprA*, encoding elastase B and alkaline protease, respectively, were also key enzymes required for  
15 mucin-based growth. Elastase B is a quorum sensing-regulated, prototypical virulence factor of *P.*  
16 *aeruginosa* (63,64) and has been shown to degrade a wide variety of host proteins such as collagen,  
17 elastin, immunoglobulins and complement (65). Similarly, AprA (aeruginolysin) is a metallo-  
18 endopeptidase that has also been shown to degrade physiological substrates *in vivo* (65). While it is  
19 possible that other, yet-to-be identified proteases also contribute to mucin degradation, both LasB and  
20 AprA have been detected in abundance in the CF airways (66-69). Importantly, both *lasB* and *aprA*  
21 mutants have also shown attenuated virulence in animal infection models (70,71), suggesting an  
22 important role for these proteases in lung disease pathogenesis. Given that both enzymes have also  
23 been implicated in bacterial keratitis, where colonization of the corneal layer was restricted in both LasB  
24 and AprA-deficient mutants (72,73), we speculate that these two proteases are also important for *P.*  
25 *aeruginosa* nutrient acquisition and persistence at other mucin-rich sites of infection.

26         Understanding how respiratory pathogens adapt to the *in vivo* nutritional environment has  
27 important implications for the treatment of CF lung disease. As a step in this direction, this genome-wide

1 survey of mucin utilization strategies has provided a window into a potential mechanism of *P. aeruginosa*  
2 growth within the lower airways. While growth on mucins was limited, our data demonstrate that mucin  
3 degradation alone can support low densities of PA14, which may allow for bacterial persistence when  
4 nutrients are scarce (e.g. early stages of disease). We concede that the portrait of *in vivo* pathogen  
5 growth is never simple in a disease with an array of etiologies. It is likely that as airway infections evolve,  
6 the bacterial community and the host airway milieu change over time and between patients such that  
7 bioavailable nutrient pools are altered. Going forward, it will be important to consider how bacterial  
8 carbon acquisition strategies vary with disease states, and how they can be manipulated as a means of  
9 mitigating chronic CF airway infections.

10  
11

## ACKNOWLEDGEMENTS

12 We acknowledge Caleb Levar and Chi-Ho Chan (Biotechnology Institute) for their assistance with  
13 TnSeq, and the Minnesota Supercomputing Institute (MSI). This work was supported by a Pathway to  
14 Independence Award from the National Heart Lung and Blood Institute to RCH (R00HL114862) and the  
15 National Center for Advancing Translational Sciences (UL1TR000114). JMF was support by a National  
16 Institutes of Health Lung Sciences T32 fellowship (#2T32HL007741-21) awarded through the National  
17 Heart Lung & Blood Institute and a Cystic Fibrosis Foundation Postdoctoral Fellowship (FLYNN16F0).

18  
19

## REFERENCES

- 20 1. **Kerem BR, Rommens JM, Buchanan JA, Markiewicz D, Cox TK, Chakravarti A, Buchwald**  
21 **M, Tsui LC.** 1989. Identification of the cystic fibrosis gene: genetic analysis. *Science* **245**:1073-  
22 1080.
- 23 2. **Davis PB.** 2006. Cystic fibrosis since 1938. *Am J Resp Crit Care Med* **173**:475-482.
- 24 3. **Rubin BK.** 2007. Mucin structure and properties in cystic fibrosis. *Paediatr Respir Rev* **8**:4-7.
- 25 4. **Lyczak JB, Cannon CL, Pier GB.** 2000. Establishment of *Pseudomonas aeruginosa* infection:  
26 lessons from a versatile opportunist. *Microb Infect* **2**:1051-1060.
- 27 5. **Hoiby N, Johansen HK, Moser C, Song Z, Ciofu O, Kharazmi A.** 2001. *Pseudomonas*  
28 *aeruginosa* and the *in vitro* and *in vivo* biofilm mode of growth. *Microb Infect* **3**:23-35.

- 1       **6. Palmer KL, Mashburn LM, Singh PK, Whiteley M.** 2005. Cystic fibrosis sputum supports  
2       growth and cues key aspects of *Pseudomonas aeruginosa* physiology. *J Bacteriol* **187**:5267-  
3       5277.
- 4       **7. Voynow JA, Rubin BK.** 2009. Mucins, mucus and sputum. *Chest* **135**:505-512.
- 5       **8. Lamblin G, Degroote S., Perini JM, Delmotte P, Scharfman A, Davril M.** 2001. Human airway  
6       mucin glycosylation: a combinatorial of carbohydrate determinants which vary in cystic fibrosis.  
7       *Glycoconjugate J* **18**:661-684.
- 8       **9. Kreda SM, Davis CW, Rose MC.** 2012. CFTR, mucins, and mucus obstruction in cystic fibrosis.  
9       *Cold Spring Harbor Perspectives in Medicine* **2**:a009589.
- 10       **10. Rose MC.** 1988. Epithelial mucous glycoproteins and cystic fibrosis. *Hormone Metabol Res*  
11       **20**:601-608.
- 12       **11. Rose MC, Voynow JA.** 2006. Respiratory tract mucin genes and mucin glycoproteins in health  
13       and disease. *Physiol Rev.* **86**: 245-278.
- 14       **12. Thornton DJ, Rousseau K, McGuckin MA.** 2007. Structure and function of the polymeric  
15       mucins in airway mucus. *Annu Rev Physiol.* **70**:459-486.
- 16       **13. Arora SK, Ritchings BW, Almira EC, Lory S, Ramphal R.** 1998. The *Pseudomonas aeruginosa*  
17       flagellar cap protein, FliD, is responsible for mucin adhesion. *Infect Immun* **66**:1000-1007.
- 18       **14. Carnoy C, Ramphal R, Scharfman A, Lo-Guidice JM, Houdret N, Klein A, Galabert C,**  
19       **Lamblin G, Roussei P.** 1993. Altered carbohydrate composition of salivary mucins from patients  
20       with cystic fibrosis and the adhesion of *Pseudomonas aeruginosa*. *Am J Resp Cell Mol Biol.*  
21       **9**:323.
- 22       **15. Ramphal R, Arora SK.** 2001. Recognition of mucin components by *Pseudomonas aeruginosa*.  
23       *Glycoconjugate J* **18**:709-713.
- 24       **16. Caldara M, Friedlander RS, Kavanaugh NL, Aizenberg J, Foster KR, Ribbeck K.** 2012. Mucin  
25       biopolymers prevent bacterial aggregation by retaining cells in the free-swimming state. *Curr Biol*  
26       **22**:2325-2330.



- 1     **17. Haley CL, Kruczek C, Qaisar U, Colmer-Hamood JA, Hamood A.** 2014. Mucin inhibits  
2         *Pseudomonas aeruginosa* biofilm formation by significantly enhancing twitching motility. *Can J*  
3         *Microbiol* **60**:155-166.
- 4     **18. Landry RM, An D, Hupp JT, Singh PK, Parsek MR.** 2006. Mucin-*Pseudomonas* interactions  
5         promote biofilm formation and antibiotic resistance. *Mol Microbiol* **59**:142-151.
- 6     **19. Staudinger BJ, Muller MF, Halldorsson S, Boes B, Angermeyer A, Nguyen D, Rosen H,**  
7         **Baldursson O., Gottfeosson M, Gudmundsson GH, Singh PK.** 2014. Conditions associated  
8         with the cystic fibrosis defect promote chronic *Pseudomonas aeruginosa* infection. *Am J Crit Care*  
9         *Med* **189**:812-824.
- 10    **20. Yeung ATY, Parayno A, Hancock REW.** 2012. Mucin promotes rapid surface motility in  
11         *Pseudomonas aeruginosa*. *mBio* **3**:e00073-12.
- 12    **21. Lory S, Jin S, Boyd JM, Rakeman JL, Bergman P.** 1996. Differential gene expression by  
13         *Pseudomonas aeruginosa* during interaction with respiratory mucus. *Am J Resp Crit Care Med*  
14         **154**:S183.
- 15    **22. Berry M, Harris A, Lumb R, Powell K.** 2002. Commensal ocular bacteria degrade mucins. *Brit J*  
16         *Ophthalmol* **86**:1412-1416.
- 17    **23. Rho J, Wright DP, Christie DL, Clinch K, Furneaux RH, Robertson AM.** 2005. A novel  
18         mechanism for desulfation of mucin: Identification and cloning of a mucin-desulfating glycosidase  
19         (sulfoglycosidase) from *Prevotella* strain RS2. *J Bacteriol* **187**:1543-1551.
- 20    **24. Desai MS, Seekatz A, Koropatkin NM, Kamada N, Hickey CA, Wolter M, Pudlo NA, Kitamoto**  
21         **S, Terrapon N, Muller A, Young VB, Henrissat B, Wilmes P, Stappenback TS, Nunez G,**  
22         **Martens EC.** 2016. A dietary fiber-deprived gut microbiota degrades the colonic mucus barrier  
23         and enhances pathogen susceptibility. *Cell* **167**:1339-1353.
- 24    **25. Houdret N, Ramphal R, Scharfman A, Perini JM, Fillat M, Lamblin G, Roussei P.** 1998.  
25         Evidence for the *in vivo* degradation of human respiratory mucins during *P. aeruginosa* infection.  
26         *Biochim Biophys Acta* **992**:96-105.

- 1       **26. Jansen H, Hart CA, Rhodes JM, Saunders JR, Smalley JW.** 1999. A novel mucin-sulfatase  
2           activity found in *Burkholderia cepacia* and *Pseudomonas aeruginosa*. J Med Microbiol **48**:551-557.
- 3       **27. Leprat R, Michel-Briand Y.** 1980. Extracellular neuraminidase production by a strain of  
4           *Pseudomonas aeruginosa* isolated from cystic fibrosis. Annal Microbiol **131**:209-222.
- 5       **28. Robinson CV, Elkins MR, Bialkowski KM, Thornton DJ, Kertesz MA.** 2012. Desulfurization of  
6           mucin by *Pseudomonas aeruginosa*: influence of sulfate in the lungs of cystic fibrosis patients. J  
7           Med Microbiol **61**:1644-1653.
- 8       **29. Schwab U, Abdullah LH, Perlmutter OS, Albert D, Davis CW, Arnold RR, Yankaskas JR,**  
9           **Gilligan P, Neubauer H, Randell SH, Boucher RC.** 2014. Localization of *Burkholderia cepacia*  
10          Complex Bacteria in Cystic Fibrosis Lungs and Interactions with *Pseudomonas aeruginosa* in  
11          hypoxic mucus. Infect Immun **82**:4729-4745.
- 12       **30. Boat TF, Chen PW, Iyer RN, Carlson DM, Polony I.** 1976. Human respiratory tract secretions.  
13          Arch Biochem Biophys. **177**: 95-104.
- 14       **31. Scawen M, Allen A.** 1977. The action of proteolytic enzymes on the glycoprotein from pig gastric  
15          mucus. Biochem J. **163**:363-368.
- 16       **32. Sriramulu DD, Lunsdorf H, Lam JS, Romling U.** 2005. Microcolony formation: a novel biofilm  
17          model of *Pseudomonas aeruginosa* for the cystic fibrosis lung. J Med Microbiol **54**:667-676.
- 18       **33. Fung C, Naughton S, Turnbull L, Tingpej P, Rose B, Arthur J, Hu H, Harmer C, Harbour C,**  
19           **Hassett DJ, Whitchurch CB.** 2010. Gene expression of *Pseudomonas aeruginosa* in a mucin-  
20          containing synthetic growth medium mimicking cystic fibrosis lung sputum. J Med Microbiol  
21          **59**:1089-1100.
- 22       **34. Flynn JM, Niccum D, Dunitz J, Hunter RC.** 2016. Evidence and role for bacterial mucin  
23          degradation in cystic fibrosis airway disease. PLoS Pathogens **12**:e1005846.
- 24       **35. Kragh KN, Alhede M, Jensen PO, Moser C, Scheike T, Jacobsen CS, Poulsen SS,**  
25           **Eickhardt-Sorensen SR, Trostrup H, Christoffersen L, Hougen HP, Rickelt LF, Kuhl M,**  
26           **Hoiby N, Bjarnsholt T.** 2014. Polymorphonuclear leukocytes restrict growth of *Pseudomonas*  
27          *aeruginosa* in the lungs of cystic fibrosis patients. Infect Immun **82**:4477-4486.

- 1       **36. van Opijnen T, Camilli A.** 2010. Genome-wide fitness and genetic interactions by Tn-seq, a  
2       high-throughput massively parallel sequencing method for microorganisms. *Curr Protocol*  
3       *Microbiol* 14:7-16.
- 4       **37. Marsili E, Rollefson JB, Baron DB, Hozalski RM, Bond DR.** 2008. Microbial biofilm  
5       voltammetry: Direct electrochemical characterization of catalytic electrode-attached biofilms. *Appl*  
6       *Environ Microbiol* **74**:7329-7337.
- 7       **38. Rahme LG, Stevens EJ, Wolfort SF, Shao J.** 1995. Common virulence factors for bacterial  
8       pathogenicity in plants and animals. *Science* **268**:1899.
- 9       **39. Saltikov CW, Newman DK.** 2003. Genetic identification of a respiratory arsenate reductase. *Proc*  
10       *Nat Acad Sci USA* **100**:10983-10988.
- 11       **40. Brutinel ED, Gralnick JA.** 2012. Anomalies of the anaerobic tricarboxylic acid cycle in *Shewanella*  
12       *oneidensis* revealed by Tn-Seq. *Mol Microbiol* **86**:273-283.
- 13       **41. Hartl DL.** 1989. Transposable element *mariner* in *Drosophila* species, p 5531-5536. *In* Berg DE,  
14       Howe MM (ed), *Mobile DNA*. ASM Press, Washington, DC.
- 15       **42. Kovach ME, Elzer PH, Hill DS, Robertson GT, Farris MA, Roop RM, Peterson KM.** 1995. Four  
16       new derivatives of the broad-host-range cloning vector pBBR1MCS, carrying different antibiotic  
17       resistance cassettes. *Gene* **166**:175-176.
- 18       **43. Gibson DG, Young L, Chuang RY, Venter JC, Hutchison CA, Smith HO.** 2009. Enzymatic  
19       assembly of DNA molecules up to several hundred kilobases. *Nat Methods* **6**:343-345.
- 20       **44. Giardine B, Riemer C, Hardison RC, Burhans R, Elnitski L, Shah P.** 2005. Galaxy: a platform  
21       for interactive large-scale genome analysis. *Genome Res* **15**:1451-1455.
- 22       **45. Blankenberg D, Von Kuster GV, Coraor N, Ananda G, Lazarus R, Mangan M, Nekrutenko A,**  
23       **Taylor J.** 2010. Galaxy: a web-based genome analysis tool for experimentalists. *Curr Protoc Mol*  
24       *Biol* 19-10
- 25       **46. Goecks J, Nekrutenko A, Taylor J.** 2010. Galaxy: a comprehensive approach for supporting  
26       accessible, reproducible, and transparent computational research in the life sciences. *Genome*  
27       *Biol* **11**:1.

- 1       **47. Derrien M, Collado MC, Ben-Amor, Salminen S, de Vos WM.** 2008. The mucin degrader  
2       *Akkermansia muciniphila* is an abundant resident of the human intestinal tract. *Appl Environ*  
3       *Microbiol* 74:1646-1648.
- 4       **48. Martens EC, Chiang HC, Gordon JL.** 2008. Mucosal glycan foraging enhances fitness and  
5       transmission of a Saccharolytic human gut bacterial symbiont. *Cell Host Microbe* 4:447-457.
- 6       **49. Terra VS, Homer KA, Rao SG, Andrew PW, Yesilkava H.** 2010. Characterization of novel B-  
7       galactosidase activity that contributes to glycoprotein degradation and virulence in *S.*  
8       *pneumoniae*. *Infect Immun* 78:348-357.
- 9       **50. Wickström C, Svensäter G.** 2008. Salivary gel-forming mucin MUC5B – a nutrient for dental  
10       plaque bacteria. *Oral Microbiol Immunol* 23:177-182.
- 11       **51. Bradshaw DJ, Homer KA, Marsh PD, Beighton.** 1994. Metabolic cooperation in oral microbial  
12       communities during growth on mucin. *Microbiol* 140:3407-3412.
- 13       **52. Henderson AG, Ehre C, Button B, Abdullah LH, Cai LH, Leigh MW, DeMaria GC, Matsui H,**  
14       **Donaldson SH, Davis CW, Sheehan JK, Boucher RC, Kesimer M.** 2014. Cystic fibrosis airway  
15       secretions exhibit mucin hyperconcentration and increased osmotic pressure. *J Clin Invest*  
16       124:3047-3060.
- 17       **53. Lindsey TL, Hagins JM, Sokol PA, Silo-Suh LA.** 2008. Virulence determinants from a cystic  
18       fibrosis isolate of *Pseudomonas aeruginosa* isocitrate lyase. *Microbiology* 154:1616-1627.
- 19       **54. Fanhoe KC, Flanagan ME, Gibson G, Shanmugasundaram V, Che Y, Tomaras AP.** 2012.  
20       Non-traditional antibacterial screening approaches for the identification of novel inhibitors of the  
21       glyoxylate shunt in Gram-negative pathogens. *PLoS One.* 7:e51732.
- 22       **55. Son MS, Matthews WJ, Kang Y, Nguyen DT, Hoang TT.** 2007. *In vivo* evidence of  
23       *Pseudomonas aeruginosa* nutrient acquisition and pathogenesis in the lungs of cystic fibrosis  
24       patients. *Infect Immun* 75:5313-5324.
- 25       **56. Hoboth C, Hoffmann R, Eichner A, Henke C, Schmoltdt S, Imhof A, Heesemann J, Hogardt**  
26       **M.** 2009. Dynamics of adaptive microevolution of hypermutable *Pseudomonas aeruginosa* during  
27       chronic pulmonary infection in patients with cystic fibrosis. *J Infect Dis* 200:118-130.

- 1       **57. Mirkovic B, Murray MA, Lavelle GM, Molloy K, Azim AA, Gunaratnam C, Healy F, Slattery D,**  
2       **McNally P, Hatch J, Wolfgang M, Tunney MM, Muhlebach M, Devery R, Greene CM,**  
3       **McElvaney NG.** 2015. The role of short-chain fatty acids, produced by anaerobic bacteria, in the  
4       cystic fibrosis airway. *Am J Resp Crit Care Med* **192**:1314-1324.
- 5       **58. Ghorbani P, Santhakumar P, Hu Q, Djadeu P, Wolever TMS, Palaniyar N, Grasemann H.**  
6       2015. Short-chain fatty acids affect cystic fibrosis airway inflammation and bacterial growth. *Eur*  
7       *Resp J* **28**:ERJ-01436.
- 8       **59. Anstrom DM, Remington SJ.** 2006. The product complex of *Mycobacterium tuberculosis* malate  
9       synthase revisited. *Protein Sci* **15**:2002-2007.
- 10       **60. Dunn MF, Ramirez-Trujillo JA, Hernandez-Lucas I.** 2009. Major roles of isocitrate lyase and  
11       malate synthase in bacterial and fungal pathogenesis. *Microbiol* **155**:3166-3175.
- 12       **61. McKinney JD, zu Bentrup KH, Munoz-Elias EJ, Miczak A, Chen B, Chan WT, Swenson D,**  
13       **Sacchettini D, Jacobs WR, Russell DG.** 2000. Persistence of *Mycobacterium tuberculosis* in  
14       macrophages and mice requires the glyoxylate shunt enzyme isocitrate lyase. *Nature* **406**:735-  
15       738.
- 16       **62. Van Schaik EJ, Marina T, Woods DE.** 2009. *Burkholderia pseudomallei* isocitrate lyase is a  
17       persistence factor in pulmonary melioidosis: implications for the development of isocitrate lyase  
18       inhibitors and novel antimicrobials. *Infect Immun* **77**:4275-4283.
- 19       **63. Williams P, Camara M.** 2009. Quorum sensing and environmental adaptation in *Pseudomonas*  
20       *aeruginosa*: a tale of regulatory networks and multifunctional signal molecules. *Curr Op Microbiol*  
21       **12**:182-191.
- 22       **64. Voynow JA, Fischer BM, Zheng S.** 2008. Proteases and cystic fibrosis. *Int J Biochem Cell Biol*  
23       **40**:1238-1245.
- 24       **65. Matsumoto K.** 2004. Role of bacterial proteases in pseudomonal and serratial keratitis. *Biol*  
25       *Chem* **385**:1007-1016.
- 26       **66. Jaffar-Bandjee MC, Lazdunski A, Bally M, Carrere J, Chazallete JP, Galabert C.** 1995.  
27       Production of elastase, exotoxin A, and alkaline protease in sputa during pulmonary exacerbation

- 1 of cystic fibrosis in patients chronically infected by *Pseudomonas aeruginosa*. J Clin Microbiol  
2 **33**:924-929.
- 3 **67. Doring G, Obernesser HJ, Botzenhart K, Flehmig B, Hoiby N, Hofmann A.** 1983. Proteases  
4 of *Pseudomonas aeruginosa* in patients with cystic fibrosis. J Infect Dis **147**:744-750.
- 5 **68. Suter S, Schaad UB, Roux L, Nydegger UE, Waldvogel FA.** 1984. Granulocyte neutral  
6 proteases and *Pseudomonas* elastase as possible causes of airway damage in patients with  
7 cystic fibrosis. J Infect Dis **149**:523-531.
- 8 **69. Upritchard HG, Cordwell SJ, Lamont IL.** 2008. Immunoproteomics to examine cystic fibrosis  
9 host interactions with extracellular *Pseudomonas aeruginosa* proteins. Infect Immun **76**:4624-  
10 4632
- 11 **70. Liehl P, Blight M, Vodovar N, Bocard F, Lemaitre B.** 2006. Prevalence of local immune  
12 response against oral infection in a *Drosophila/Pseudomonas* infection model. PLoS Pathogens  
13 **2**:e56.
- 14 **71. Woods DE, Cryz SJ, Friedman RL, Iglewski BH.** 1982. Contribution of toxin A and elastase to  
15 virulence of *Pseudomonas aeruginosa* in chronic infection of rats. Infect Immun **36**:1223-1228.
- 16 **72. Howe TR, Iglewski BH.** 1984. Isolation and characterization of alkaline protease-deficient  
17 mutants of *Pseudomonas aeruginosa in vitro* and in a mouse eye model. Infect Immun **43**:1058-  
18 1063.
- 19 **73. Ohman DE, Burns RP, Iglewski BH.** 1980a. Corneal infections in mice with toxin A and elastase  
20 mutant of *Pseudomonas aeruginosa*. J Infect Dis **142**:836-842.
- 21  
22  
23  
24  
25  
26

1 **FIGURES AND TABLES**

2 **Table 1.** Bacterial strains and plasmids

| Strain or Plasmid      | Characteristic                                     | Source     |
|------------------------|----------------------------------------------------|------------|
| <i>P. aeruginosa</i>   |                                                    |            |
| PA14                   | Clinical isolate UCBPP-PA14                        | 38         |
| PA14 $\Delta lasA$     | PA14 with a deletion of PA14_40290 ( <i>lasA</i> ) | This study |
| PA14 $\Delta lasB$     | PA14 with a deletion of PA14_16250 ( <i>lasB</i> ) | This study |
| PA14 $\Delta sppA$     | PA14 with a deletion of PA14_25600 ( <i>sppA</i> ) | This study |
| PA14 $\Delta aprA$     | PA14 with a deletion of PA14_48060 ( <i>aprA</i> ) | This study |
| PA14 $\Delta aceA$     | PA14 with a deletion of PA14_30050 ( <i>aceA</i> ) | This study |
| <i>E. coli</i>         |                                                    |            |
| UQ950                  | DH5 $\alpha$ $\lambda$ pir                         | 39         |
| WM3064                 | Donor strain for conjugations                      | 39         |
| Plasmids               |                                                    |            |
| pEB001                 | pMiniHimar RB-1 with Mmel sites                    | 40         |
| pJF1                   | pEB001 with gent <sup>R</sup>                      | This study |
| pBBR1MCS-5             | Broad host range vector, Gm                        | 42         |
| pBBR1MCS-5 <i>lasB</i> | Complementation vector for <i>lasB</i>             | This study |
| pBBR1MCS-5 <i>aprA</i> | Complementation vector for <i>aprA</i>             | This study |
| pBBR1MCS-5 <i>aceA</i> | Complementation vector for <i>aceA</i>             | This study |
| pSMV8 <i>lasA</i>      | Deletion vector for <i>lasA</i>                    | This study |
| pSMV8 <i>lasB</i>      | Deletion vector for <i>lasB</i>                    | This study |
| pSMV8 <i>sppA</i>      | Deletion vector for <i>sppA</i>                    | This study |
| pSMV8 <i>aprA</i>      | Deletion vector for <i>aprA</i>                    | This study |
| pSMV8 <i>aceA</i>      | Deletion vector for <i>aceA</i>                    | This study |

3

4

5

6

7

8

9

10

1 **Table 2.** TnSeq fitness values.

| <b>Category</b>                | <b>Gene name</b>               | <b>1st Phase</b> | <b>2nd Phase</b> | <b>Description</b>                     |
|--------------------------------|--------------------------------|------------------|------------------|----------------------------------------|
| <b>Central metabolism</b>      | <i>aceA</i>                    | -4.40            | 0.29             | Glyoxylate pathway                     |
|                                | <i>fumA</i>                    | -3.20            | -0.60            | TCA cycle, fumarase                    |
|                                | <i>glcB</i>                    | -4.47            | -0.59            | Glyoxylate pathway                     |
| <b>Amino acid biosynthesis</b> | <i>argD</i>                    | -2.66            | 0.02             | Arginine biosynthesis                  |
|                                | <i>cysG</i>                    | -2.05            | -0.52            | Cysteine biosynthesis                  |
|                                | <i>cysH</i>                    | -6.45            | 0.35             | Cysteine biosynthesis                  |
|                                | <i>hom</i>                     | -6.11            | -0.46            | Amino acid biosynthesis                |
|                                | <i>ilvC</i>                    | -5.20            | -0.36            | Isoleucine biosynthesis                |
|                                | <i>ilvD</i>                    | -6.82            | -0.64            | Isoleucine biosynthesis                |
|                                | <i>ilvI</i>                    | -5.14            | -0.19            | Branched-chain amino acid biosynthesis |
|                                | <i>leuA</i>                    | -4.93            | -0.02            | Leucine biosynthesis                   |
|                                | <i>leuB</i>                    | -8.44            | 0.03             | Leucine biosynthesis                   |
|                                | <i>metW</i>                    | -6.50            | -0.22            | Methionine biosynthesis                |
|                                | <i>metX</i>                    | -5.24            | -0.61            | Methionine biosynthesis                |
|                                | <i>metZ</i>                    | -6.30            | -0.15            | Methionine biosynthesis                |
|                                | <i>orfK</i>                    | -2.52            | -0.11            | Arginine biosynthesis                  |
|                                | <i>trpB</i>                    | -4.05            | -0.93            | Tryptophan biosynthesis                |
|                                | <i>trpE</i>                    | -4.50            | -0.14            | Tryptophan biosynthesis                |
|                                | <i>tyrB</i>                    | -4.29            | -0.19            | Tyrosine biosynthesis                  |
|                                | <b>Nucleotide Biosynthesis</b> | <i>gda1</i>      | -4.40            | 0.97                                   |
| <i>purF</i>                    |                                | -4.80            | -2.18            | Purine biosynthesis                    |
| <i>purL</i>                    |                                | -5.78            | 0.89             | Purine biosynthesis                    |
| <i>purN</i>                    |                                | -4.32            | 0.06             | Purine biosynthesis                    |
| <i>wbpM</i>                    |                                | -2.10            | -0.41            | Nucleotide sugar epimerase             |
| <b>Cofactor Biosynthesis</b>   | <i>bioA</i>                    | -2.64            | -0.29            | Biotin biosynthesis                    |
|                                | <i>bioB</i>                    | -2.67            | -0.80            | Biotin biosynthesis                    |
|                                | <i>gshA</i>                    | -3.41            | -0.70            | Glutathione biosynthesis               |
|                                | <i>nadB</i>                    | -2.14            | 0.21             | NAD biosynthesis                       |
|                                | <i>spuC</i>                    | -2.07            | -0.92            | Polyamine biosynthesis                 |

2

3



1

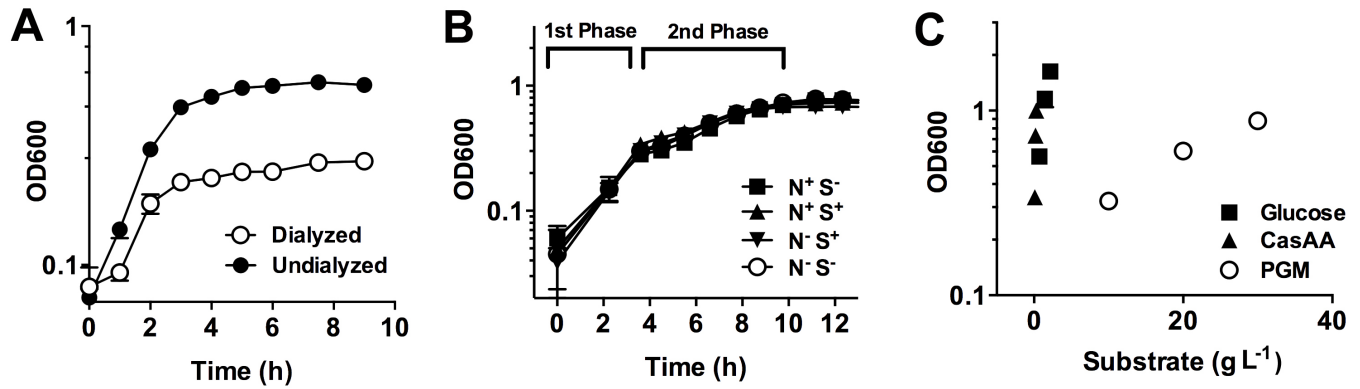

2

3 **Figure 1. *P. aeruginosa* utilizes mucins inefficiently in a biphasic growth pattern.** (A) PA14 growth  
4 on dialyzed PGM (10 g L<sup>-1</sup>) achieves half the final density relative to undialyzed preparations. (B) PA14  
5 displays identical biphasic growth in the presence and absence of sulfur (MgSO<sub>4</sub>) and nitrogen (NH<sub>4</sub>Cl)  
6 supplements when growing with 30 g L<sup>-1</sup> PGM. (C) PA14 growth yields (g L<sup>-1</sup> OD<sup>-1</sup>) on glucose and  
7 casamino acids far exceeded yield obtained with dialyzed PGM.

8

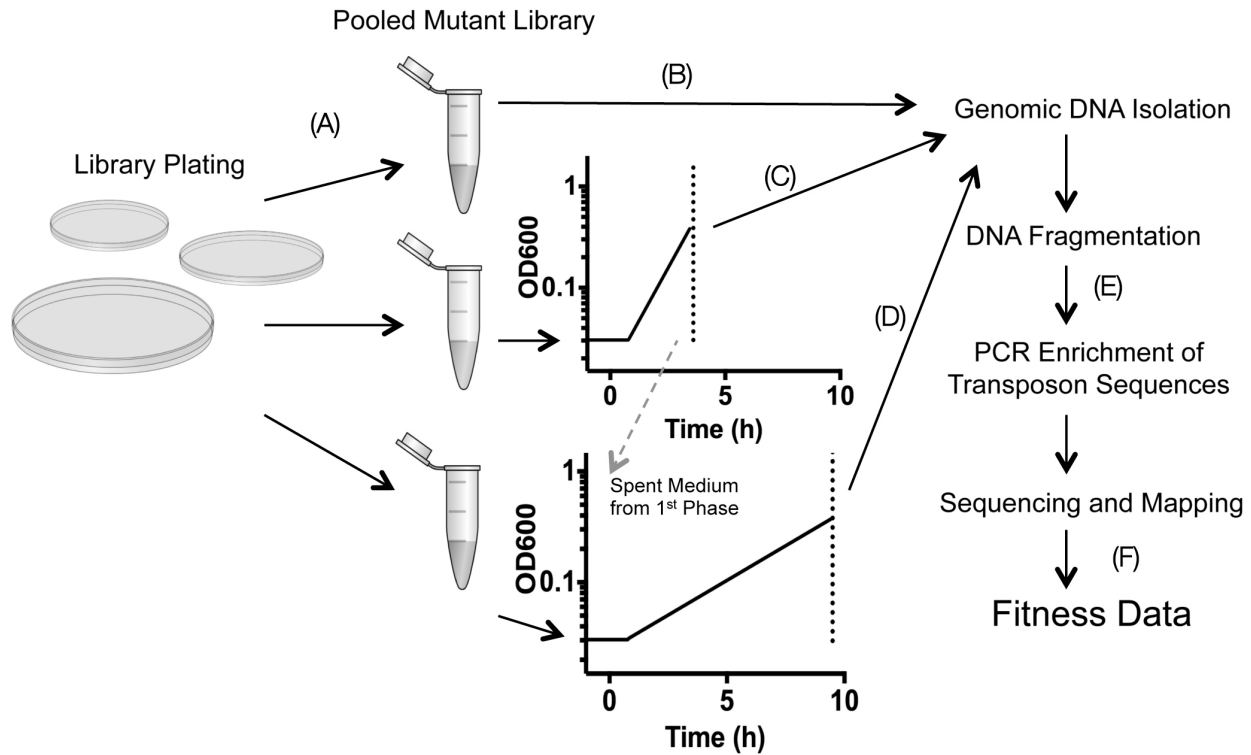

1

2 **Figure 2. TnSeq experimental approach.** (A) a transposon insertion library of PA14 is first constructed  
3 in which each mutant colony contains a single transposon insertion in its genome. (B) DNA is isolated  
4 from one aliquot of the pooled library, while two others are used as the source inoculum for two  
5 conditions under which selection is performed: (C) minimal mucin medium, and (D) filter sterilized mucin  
6 medium from (C) in which nutrients have been depleted. Genomic DNA is also isolated from each  
7 recovered culture. (E) Fragmented DNA is then PCR amplified generating bacterial-specific sequences  
8 flanked by Illumina-specific sequences with unique barcodes. (F) Sequence reads are then assigned to  
9 each selection conditions based on their barcode identifier, mapped to the PA14 genome counted, and  
10 used to calculate a fitness score of each transposon insertion.

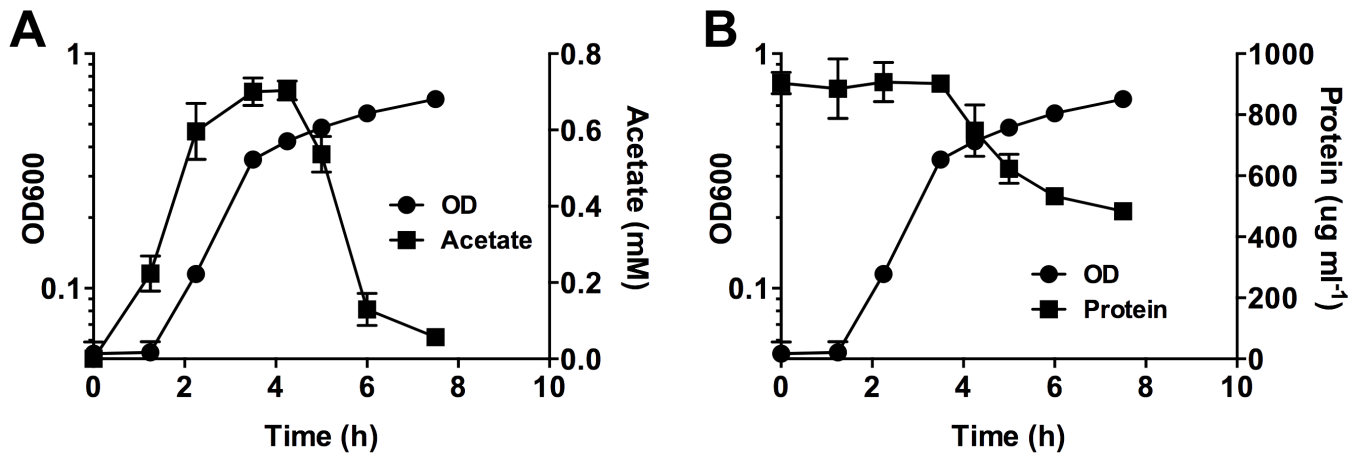

1

2 **Figure 3. Acetate and protein content during mucin growth.** (A) Acetate accumulates in the growth  
3 medium followed by its rapid consumption by *P. aeruginosa*. (B) Total protein also decreases in the  
4 second growth phase, suggesting amino acid liberation from the mucin polypeptide.

5

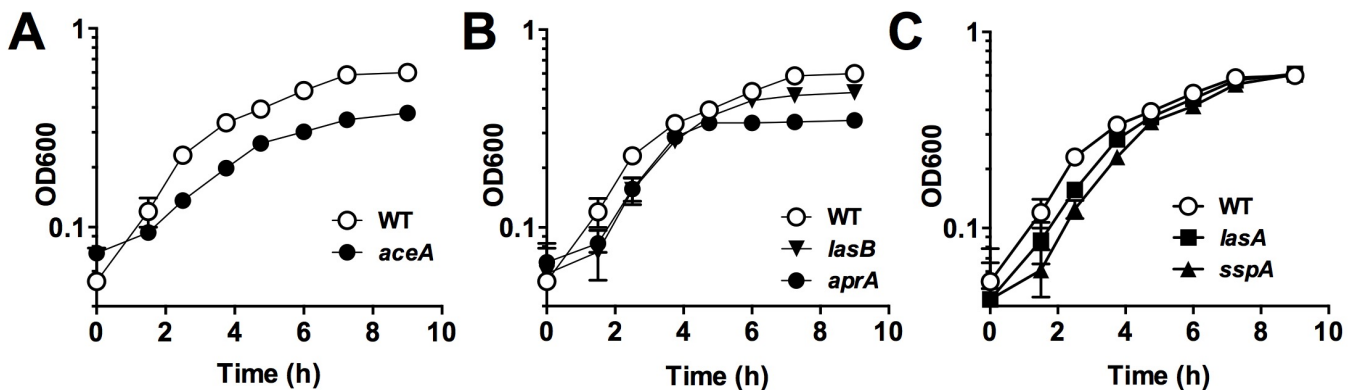

6

7

8 **Figure 4. AceA, LasB and AprA are used during mucin growth.** (A) Deletion of isocitrate lyase  
9 (*AceA*) confers a partial growth defect in *P. aeruginosa* when provided mucins as the sole carbon source.  
10 The extracellular proteases (B) *LasB* and *AprA*, but not (C) *LasA* and *SspA* are used in the degradation  
11 and consumption of mucin polypeptides.

12

13

14
